# Supplementary material for: A quantitative study of exocytosis of titanium dioxide nanoparticles from neural stem cells
Source: Royal Society of Chemistry journal article supplement (doi:10.1039/c3nr00796k), 2013-01-01
Supplement: c3nr00796k.pdf [file c3nr00796k.pdf]

Supporting Information

A Quantitative and Dynamic Study of Exocytosis of Titanium  
Dioxide Nanoparticles from Neural Stem Cells

Yanli Wang, Qiuxia Wu, Keke Sui, Xin-Xin Chen, Jie Fang, XuefengHu,  
Minghong Wu,Yuanfang Liu\*

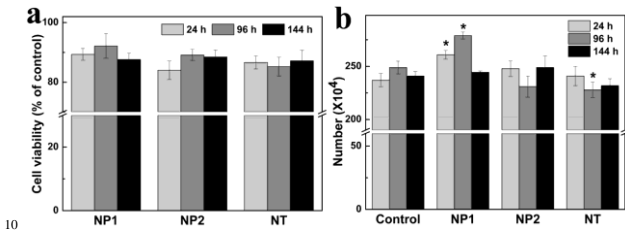

Fig.S1 The results of the cytotoxicity tests of NSCs exposed to TiO<sub>2</sub> NPs at three time points. The cytotoxicity of NSCs cultured in fresh medium after pre-incubating cells with TiO<sub>2</sub> NPs for 48 h at concentration of 50 mg L<sup>-1</sup>. (a) Viability of NSCs detected by CCK-8 assay. (b) Cell proliferation by counting the cell numbers under optical microscope. \*p<0.05 when compared with control.

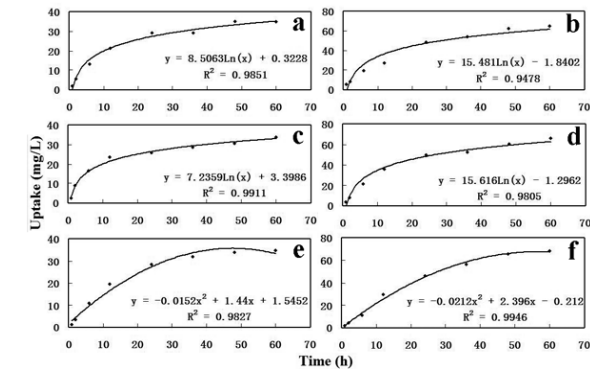

Fig. S2 Fitting curves of endocytosis of TiO<sub>2</sub> NPs. (a), (c) and (e) uptake at concentration of 50 mg L<sup>-1</sup>. (b), (d) and (f) uptake at concentration of 100 mg L<sup>-1</sup>. (a) and (b) NP1,(c) and (d) NP2,(e) and (f) NT at different time points of incubation.

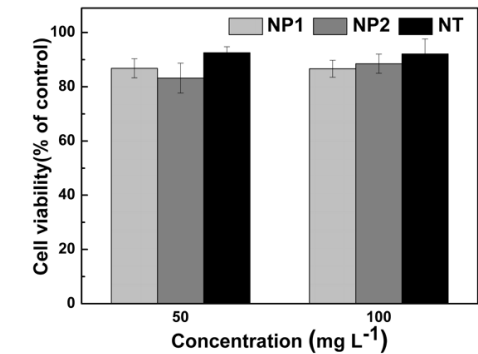

Fig.S3 The viability of NSCs detected by CCK-8 assay. NSCs were exposed to TiO<sub>2</sub> NPs for 48 h at concentrations of 50 mg L<sup>-1</sup> and 100 mg L<sup>-1</sup>.

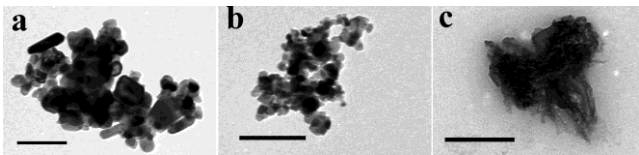

Fig. S4 TEM images of TiO<sub>2</sub> NPs. (a) NP1,(b) NP2 and(c) NT pretreated with culture medium for 24 h (Scale bars: 200 nm)

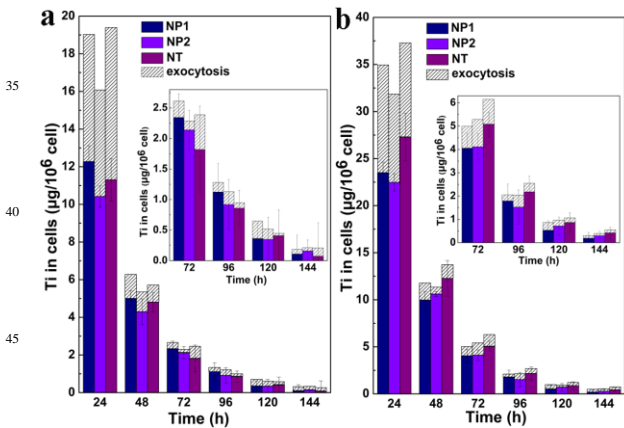

Fig. S5 The Ti content (µg per million cells) at different time points after termination of endocytosis of TiO<sub>2</sub> NPs from NSCs. (a) Cells were incubated with 50 mg L<sup>-1</sup> for 48 h; (b) cells were incubated with 100mg L<sup>-1</sup> for 48 h. The solid color pillar indicates the measured Ti content. The whole pillar (solid plus hatched) indicates the theoretical Ti content, which equals to the one half of the measured Ti content (solid color pillar) in the mother cells at the previous time point. The hatched pillar indicates Ti content exocytosed during 24 h.

Table S1 Physicochemical properties of TiO<sub>2</sub> NPs.

| Sample              | NP1            | NP2            | NT        |
|---------------------|----------------|----------------|-----------|
| Crystal phase       | anatase/rutile | anatase/rutile | amorphous |
| Purity [%]          | 98.6           | 99.8           | 99.3      |
| Zeta potential [mV] | -5.5           | -26.5          | 7.2       |
